# Supplementary material for: Associations between single-nucleotide polymorphisms of human exonuclease 1 and the risk of hepatocellular carcinoma
Source: PubMed Central journal article supplement (PMC5349980; doi:10.18632/oncotarget.13517), 2016-11-23
Supplement: oncotarget-07-87180-s001.pdf [file oncotarget-07-87180-s001.pdf]

## Associations between single-nucleotide polymorphisms of human exonuclease 1 and the risk of hepatocellular carcinoma

### SUPPLEMENTARY TABLES

Supplementary Table S1: Results of rs1047840 stratification analysis

| Variables           | Genotypes | Controls (n=1199) | Cases (n=1196) | OR (95%CI) <sup>a</sup> | P     |
|---------------------|-----------|-------------------|----------------|-------------------------|-------|
| Smoking             |           |                   |                |                         |       |
| No                  | AA        | 46                | 37             | 1.000                   | 0.595 |
|                     | AG/GG     | 962               | 712            | 0.828(0.412~1.661)      |       |
| Yes                 | AA        | 8                 | 27             | 1.000                   | 0.517 |
|                     | AG/GG     | 183               | 420            | 0.707(0.248~2.019)      |       |
| Alcohol Consumption |           |                   |                |                         |       |
| No                  | AA        | 47                | 41             | 1.000                   | 0.452 |
|                     | AG/GG     | 989               | 744            | 0.773(0.395~1.513)      |       |
| Yes                 | AA        | 7                 | 23             | 1.000                   | 0.868 |
|                     | AG/GG     | 156               | 388            | 0.908(0.291~2.834)      |       |
| HBV Infection       |           |                   |                |                         |       |
| No                  | AA        | 48                | 13             | 1.000                   | 0.190 |
|                     | AG/GG     | 1053              | 182            | 0.636(0.323~1.252)      |       |
| Yes                 | AA        | 6                 | 51             | 1.000                   | 0.676 |
|                     | AG/GG     | 92                | 950            | 1.208(0.498~2.930)      |       |
| HCC family history  |           |                   |                |                         |       |
| No                  | AA        | 54                | 59             | 1.000                   | 0.467 |
|                     | AG/GG     | 1135              | 1071           | 0.805(0.449~1.443)      |       |
| Yes                 | AA        | 1                 | 5              | 1.000                   | 0.418 |
|                     | AG/GG     | 9                 | 61             | 0.951(0.843~1.073)      |       |

<sup>a</sup>: Adjusted by logistic regression for age, gender, nations, smoking, alcohol consumption, HBV infection, and HCC family history.

Supplementary Table S2: Results of rs1776148 stratification analysis

| Variables           | Genotypes | Controls (n=1199) | Cases (n=1196) | OR (95%CI) <sup>a</sup> | P     |
|---------------------|-----------|-------------------|----------------|-------------------------|-------|
| Smoking             |           |                   |                |                         |       |
| No                  | AA        | 32                | 27             | 1.000                   | 0.225 |
|                     | AG/GG     | 976               | 722            | 0.618(0.284~1.346)      |       |
| Yes                 | AA        | 6                 | 16             | 1.000                   | 0.246 |
|                     | AG/GG     | 185               | 431            | 0.485(0.143~1.646)      |       |
| Alcohol Consumption |           |                   |                |                         |       |
| No                  | AA        | 35                | 29             | 1.000                   | 0.357 |
|                     | AG/GG     | 1001              | 756            | 0.302(0.331~1.489)      |       |
| Yes                 | AA        | 3                 | 14             | 1.000                   | 0.054 |
|                     | AG/GG     | 160               | 397            | 0.224(0.049~1.024)      |       |
| HBV Infection       |           |                   |                |                         |       |
| No                  | AA        | 37                | 10             | 1.000                   | 0.227 |
|                     | AG/GG     | 1064              | 185            | 0.633(0.301~1.330)      |       |
| Yes                 | AA        | 1                 | 33             | 1.000                   | 0.237 |
|                     | AG/GG     | 97                | 968            | 0.297(0.040~2.217)      |       |
| HCC family history  |           |                   |                |                         |       |
| No                  | AA        | 38                | 39             | 1.000                   | 0.101 |
|                     | AG/GG     | 1151              | 1091           | 0.579(0.301~1.113)      |       |
| Yes                 | AA        | 2                 | 4              | 1.000                   | 0.451 |
|                     | AG/GG     | 8                 | 62             | 0.955(0.846~1.077)      |       |

<sup>a</sup>: Adjusted by logistic regression for age, gender, nations, smoking, alcohol consumption, HBV infection, and HCC family history.

Supplementary Table S3: Results of rs4149867 stratification analysis

| Variables           | Genotypes | Controls (n=1199) | Cases (n=1196) | OR (95%CI) <sup>a</sup> | P     |
|---------------------|-----------|-------------------|----------------|-------------------------|-------|
| Smoking             |           |                   |                |                         |       |
| No                  | CC        | 727               | 509            | 1                       | 0.845 |
|                     | CT/TT     | 281               | 240            | 1.034(0.741~1.443)      |       |
| Yes                 | CC        | 131               | 309            | 1                       | 0.313 |
|                     | CT/TT     | 60                | 138            | 0.768(0.461~1.282)      |       |
| Alcohol Consumption |           |                   |                |                         |       |
| No                  | CC        | 47                | 41             | 1                       | 0.894 |
|                     | CT/TT     | 989               | 744            | 0.978(0.710~1.349)      |       |
| Yes                 | CC        | 7                 | 23             | 1                       | 0.568 |
|                     | CT/TT     | 156               | 388            | 0.847(0.479~1.498)      |       |
| HBV Infection       |           |                   |                |                         |       |
| No                  | CC        | 48                | 13             | 1                       | 0.128 |
|                     | CT/TT     | 1053              | 182            | 0.748(0.514~1.088)      |       |
| Yes                 | CC        | 6                 | 51             | 1                       | 0.241 |
|                     | CT/TT     | 92                | 950            | 1.321(0.829~2.102)      |       |
| HCC family history  |           |                   |                |                         |       |
| No                  | CC        | 54                | 59             | 1                       | 0.637 |
|                     | CT/TT     | 1135              | 1071           | 0.935(0.706~1.237)      |       |
| Yes                 | CC        | 1                 | 5              | 1                       | 0.598 |
|                     | CT/TT     | 9                 | 61             | 2.274(1.107~48.30)      |       |

<sup>a</sup>: Adjusted by logistic regression for age, gender, nations, smoking, alcohol consumption, HBV infection, and HCC family history.

Supplementary Table S4: Results of rs4149963 stratification analysis

| Variables           | Genotypes | Controls (n=1199) | Cases (n=1196) | OR (95%CI) <sup>a</sup> | P     |
|---------------------|-----------|-------------------|----------------|-------------------------|-------|
| Smoking             |           |                   |                |                         |       |
| No                  | CC        | 893               | 657            | 1                       | 0.620 |
|                     | CT/TT     | 115               | 92             | 0.886(0.549~1.430)      |       |
| Yes                 | CC        | 164               | 390            | 1                       | 0.493 |
|                     | CT/TT     | 27                | 57             | 0.783(0.390~1.574)      |       |
| Alcohol Consumption |           |                   |                |                         |       |
| No                  | CC        | 47                | 41             | 1                       | 0.741 |
|                     | CT/TT     | 989               | 744            | 0.926(0.587~1.462)      |       |
| Yes                 | CC        | 7                 | 23             | 1                       | 0.302 |
|                     | CT/TT     | 156               | 388            | 0.663(0.304~1.447)      |       |
| HBV Infection       |           |                   |                |                         |       |
| No                  | CC        | 48                | 13             | 1                       | 0.829 |
|                     | CT/TT     | 1053              | 182            | 0.945(0.566~1.578)      |       |
| Yes                 | CC        | 6                 | 51             | 1                       | 0.283 |
|                     | CT/TT     | 92                | 950            | 0.729(0.410~1.297)      |       |
| HCC family history  |           |                   |                |                         |       |
| No                  | CC        | 54                | 59             | 1                       | 0.456 |
|                     | CT/TT     | 1135              | 1071           | 0.859(0.577~1.297)      |       |
| Yes                 | CC        | 1                 | 5              | 1                       | 0.196 |
|                     | CT/TT     | 9                 | 61             | 0.135(0.007~2.804)      |       |

<sup>a</sup>: Adjusted by logistic regression for age, gender, nations, smoking, alcohol consumption, HBV infection, and HCC family history.

Supplementary Table S5: Results of rs1776181 stratification analysis

| Variables           | Genotypes | Controls (n=1199) | Cases (n=1196) | OR (95%CI) <sup>a</sup> | P     |
|---------------------|-----------|-------------------|----------------|-------------------------|-------|
| Smoking             |           |                   |                |                         |       |
| No                  | CC        | 547               | 365            | 1                       | 0.248 |
|                     | CT/TT     | 461               | 384            | 0.834(0.613~1.135)      |       |
| Yes                 | CC        | 97                | 244            | 1                       | 0.663 |
|                     | CT/TT     | 94                | 203            | 1.109(0.696~1.769)      |       |
| Alcohol Consumption |           |                   |                |                         |       |
| No                  | CC        | 47                | 41             | 1                       | 0.607 |
|                     | CT/TT     | 989               | 744            | 0.925(0.688~1.245)      |       |
| Yes                 | CC        | 7                 | 23             | 1                       | 0.54  |
|                     | CT/TT     | 156               | 388            | 0.854(0.515~1.415)      |       |
| HBV Infection       |           |                   |                |                         |       |
| No                  | CC        | 48                | 13             | 1                       | 0.607 |
|                     | CT/TT     | 1053              | 182            | 1.088(0.566~1.578)      |       |
| Yes                 | CC        | 6                 | 51             | 1                       | 0.549 |
|                     | CT/TT     | 92                | 950            | 0.629(0.139~2.858)      |       |
| HCC family history  |           |                   |                |                         |       |
| No                  | CC        | 54                | 59             | 1                       | 0.493 |
|                     | CT/TT     | 1135              | 1071           | 0.915(0.708~1.181)      |       |
| Yes                 | CC        | 1                 | 5              | 1                       | 0.494 |
|                     | CT/TT     | 9                 | 61             | 2.912(0.137~62.104)     |       |

<sup>a</sup>: Adjusted by logistic regression for age, gender, nations, smoking, alcohol consumption, HBV infection, and HCC family history.
